# Supplementary material for: Cost-effectiveness of talazoparib plus enzalutamide as first-line therapy in metastatic castration-resistant prostate cancer
Source: Research Square preprint supplement (doi:10.21203/rs.3.rs-6199993/v1), 2025-03-17
Supplement: Supplementary file 1 [file 75fb314b044c93c4fd135e40.docx]

Additional Material

**Table S1.** CHEERS Checklist (2022)

| **Topic** | **No.** | **Item** | **Reported?** |
| --- | --- | --- | --- |
| **Title and abstract** |  |  |  |
| Title | 1 | Identify the study as an economic evaluation and specify the interventions being compared. | Yes |
| Abstract | 2 | Provide a structured summary that highlights context, key methods, results, and alternative analyses. | Yes |
| **Introduction** |  |  |  |
| Background and objectives | 3 | Give the context for the study, the study question, and its practical relevance for decision making in policy or practice. | Yes |
| **Methods** |  |  |  |
| Health economic analysis plan | 4 | Indicate whether a health economic analysis plan was developed and where available. | Yes |
| Study population | 5 | Describe characteristics of the study population (such as age range, demographics, socioeconomic, or clinical characteristics). | Yes |
| Setting and location | 6 | Provide relevant contextual information that may influence findings. | Yes |
| Comparators | 7 | Describe the interventions or strategies being compared and why chosen. | Yes |
| Perspective | 8 | State the perspective(s) adopted by the study and why chosen. | Yes |
| Time horizon | 9 | State the time horizon for the study and why appropriate. | Yes |
| Discount rate | 10 | Report the discount rate(s) and reason chosen. | Yes |
| Selection of outcomes | 11 | Describe what outcomes were used as the measure(s) of benefit(s) and harm(s). | Yes |
| Measurement of outcomes | 12 | Describe how outcomes used to capture benefit(s) and harm(s) were measured. | Yes |
| Valuation of outcomes | 13 | Describe the population and methods used to measure and value outcomes. | Yes |
| Measurement and valuation of resources and costs | 14 | Describe how costs were valued. | Yes |
| Currency, price date, and conversion | 15 | Report the dates of the estimated resource quantities and unit costs, plus the currency and year of conversion. | Yes |
| Rationale and description of model | 16 | If modelling is used, describe in detail and why used. Report if the model is publicly available and where it can be accessed. | Yes |
| Analytics and assumptions | 17 | Describe any methods for analysing or statistically transforming data, any extrapolation methods, and approaches for validating any model used. | Yes |
| Characterising heterogeneity | 18 | Describe any methods used for estimating how the results of the study vary for subgroups. | Yes |
| Characterising distributional effects | 19 | Describe how impacts are distributed across different individuals or adjustments made to reflect priority populations. | Yes |
| Characterising uncertainty | 20 | Describe methods to characterise any sources of uncertainty in the analysis. | Yes |
| Approach to engagement with patients and others affected by the study | 21 | Describe any approaches to engage patients or service recipients, the general public, communities, or stakeholders (such as clinicians or payers) in the design of the study. | Not applicable |
| **Results** |  |  |  |
| Study parameters | 22 | Report all analytic inputs (such as values, ranges, references) including uncertainty or distributional assumptions. | Yes |
| Summary of main results | 23 | Report the mean values for the main categories of costs and outcomes of interest and summarise them in the most appropriate overall measure. | Yes |
| Effect of uncertainty | 24 | Describe how uncertainty about analytic judgments, inputs, or projections affect findings. Report the effect of choice of discount rate and time horizon, if applicable. | Yes |
| Effect of engagement with patients and others affected by the study | 25 | Report on any difference patient/service recipient, general public, community, or stakeholder involvement made to the approach or findings of the study | Not applicable |
| **Discussion** |  |  |  |
| Study findings, limitations, generalisability, and current knowledge | 26 | Report key findings, limitations, ethical or equity considerations not captured, and how these could affect patients, policy, or practice. | Yes |
| Other relevant information |  |  |  |
| Source of funding | 27 | Describe how the study was funded and any role of the funder in the identification, design, conduct, and reporting of the analysis | Yes |
| Conflicts of interest | 28 | Report authors conflicts of interest according to journal or International Committee of Medical Journal Editors requirements. | Yes |

From: Husereau, D., Drummond, M., Augustovski, F., de Bekker-Grob, E., Briggs, A. H., Carswell, C., et al. (2022). Consolidated health economic evaluation reporting standards 2022 (CHEERS 2022) statement: Updated reporting guidance for health economic evaluations. *MDM Policy Pract.* 7(1)**,** 23814683211061097. doi:10.1177/23814683211061097

**Table S2.** Summary of the statistical goodness-of-fit of Kaplan Meier survival curves.

| OS | | | | |
| --- | --- | --- | --- | --- |
| **Distribution pattern** | TALA, AIC | TALA, BIC | PBO, AIC | PBO, BIC |
| Exponential | 978.127 | 981.425 | 1211.163 | 1214.457 |
| Weibull | 962.791 | 969.388 | 1178.899 | 1185.485 |
| Gompertz | 971.708 | 978.305 | 1190.371 | 1196.958 |
| Log-normal | 959.214 | 965.811 | 1180.093 | 1186.680 |
| Log-logistic | 959.095 | 965.692 | 1177.360 | 1183.947 |
| PFS | | | | |
| **Distribution pattern** | TALA, AIC | TALA, BIC | PBO, AIC | PBO, BIC |
| Exponential | 959.867 | 963.165 | 1039.921 | 1043.214 |
| Weibull | 959.487 | 966.083 | 1040.473 | 1047.059 |
| Gompertz | 961.832 | 968.428 | 1041.238 | 1047.825 |
| Log-normal | 948.270 | 954.867 | 1024.881 | 1031.467 |
| Log-logistic | 952.266 | 958.862 | 1028.588 | 1035.175 |

OS: Overall survival; PFS: Progression-free survival; AIC, Akaike’s information criterion; BIC, Bayesian information criterion, TALA: Talazoparib plus enzalutamide, PBO: Placebo plus enzalutamide.

**Table S3.** The median survival time of original and reconstructed Kaplan Meier survival curve.

| Kaplan Meier survival curve | mPFS (95%CI) | mOS (95%CI) |
| --- | --- | --- |
| Original TALA+ENZA | 30.7 (24.3, 38.5) | 45.1(35.4, NR) |
| Reconstructed TALA+ENZA | 30.6 (24.9, 40.9) | 45.1 (35.8, NR) |
| Original PBO+ENZA | 12.3 (11.0, 16.5) | 31.1 (27.3, 35.4) |
| Reconstructed PBO+ENZA | 12.3 (11.0, 16.7) | 31.1 (28.0, 36.0) |

mPFS: median progression-free survival; mOS: median overall survival, NR: Not reach.

**Table S4.** Summary of the statistical goodness-of-fit of Kaplan Meier survival curves.

| Group | KM curve | Shape/Meanlog | Scale/Sdlog | Distribution |
| --- | --- | --- | --- | --- |
| Talazoparib plus enzalutamide | OS | 1.81 | 44.1 | Log-logistic |
| Talazoparib plus enzalutamide | PFS | 3.41 | 1.2 | Log-normal |
| Placebo plus enzalutamide | OS | 2.09 | 31.14 | Log-logistic |
| Placebo plus enzalutamide | PFS | 2.63 | 1.13 | Log-normal |

OS: Overall survival; PFS: Progression-free survival; AIC, Akaike’s information criterion; BIC, Bayesian information criterion.


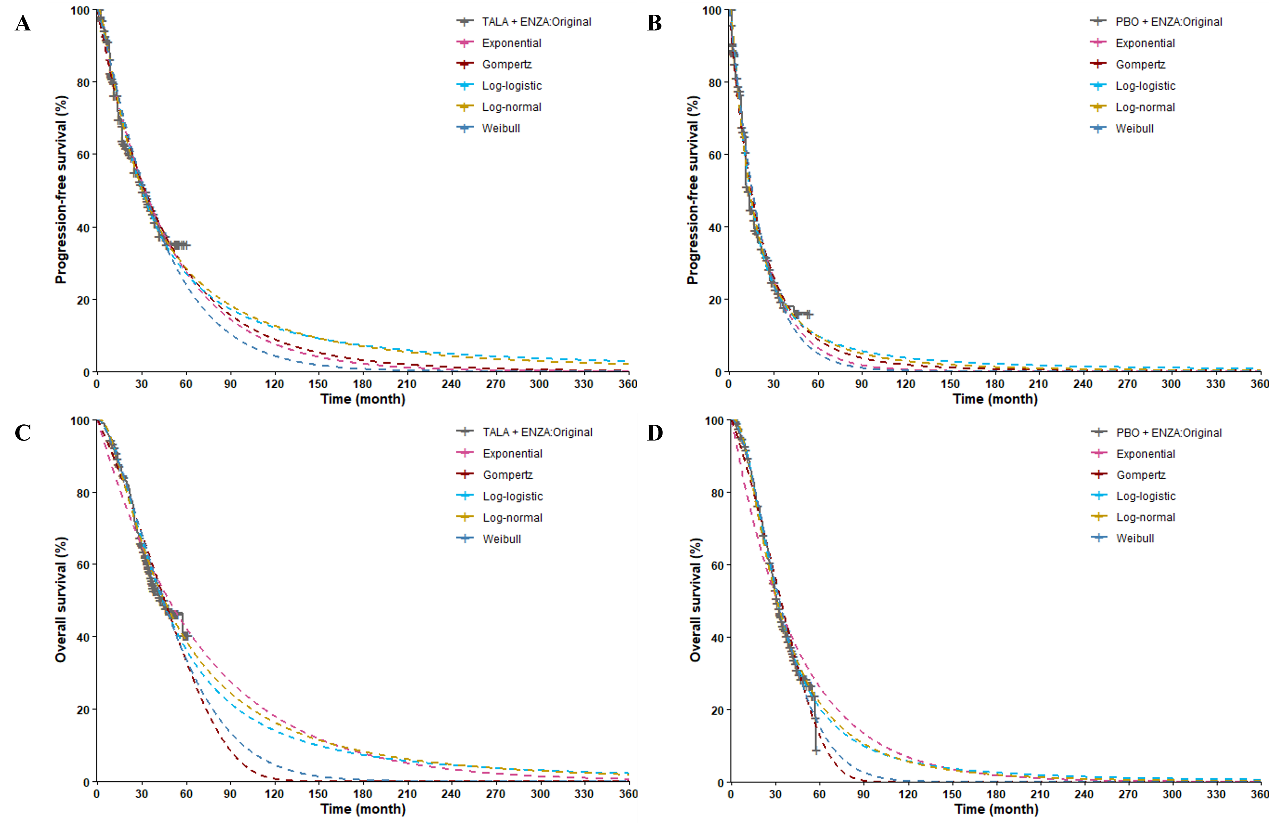


**Figure S1** Fitting and extrapolation of Kaplan Meier survival curve. (A)The results of talazoparib plus enzalutamide PFS curve. (B)The results of placebo plus enzalutamide PFS curve. (C)The results of talazoparib plus enzalutamide OS curve. (D)The results of placebo plus enzalutamide OS curve.


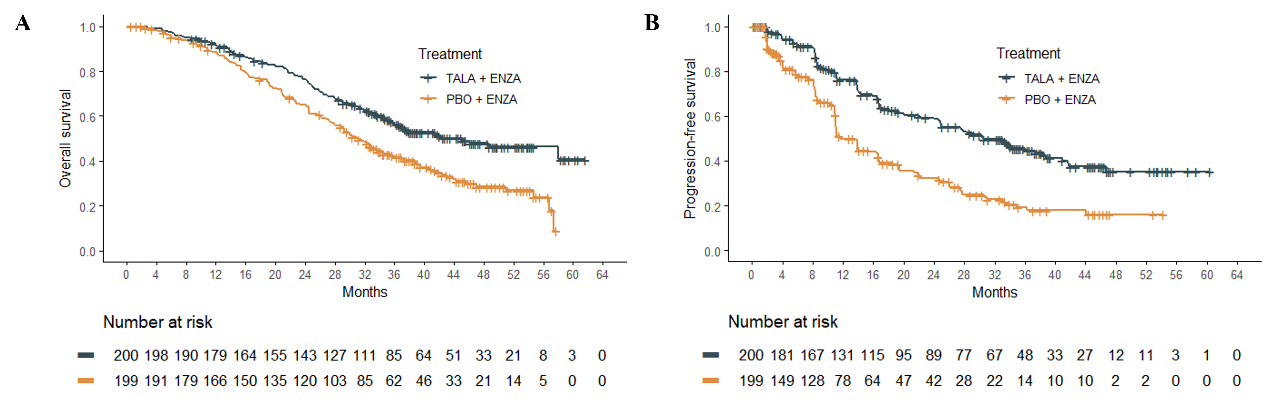


**Figure S2** Reconstruction of Kaplan Meier survival curve. (A) OS curve. (B) PFS curve.

OS, overall survival; PFS, progression-free survival.
